# Supplementary material for: SIRT6 overexpression in the nucleus protects mouse retinal pigment epithelium from oxidative stress
Source: Life Sci Alliance. 2023 Apr 25;6(7):e202201448. doi: 10.26508/lsa.202201448 (PMC10130745; doi:10.26508/lsa.202201448)
Supplement: Supplementary file 1 [file LSA-2022-01448_TableS1.xlsx]

## Sheet: Sheet1
Supplementary Table S1. Primer sequences
Gene	Species	Primer name	Sequence	Purpose
	M: mouse	F: forward
	H: human	R: reverse
RPE markers
Sox9	M	mSox9-F	GTA CCC GCA TCT GCA CAA C	Expression
		mSox9-R	TCC ACG AAG GGT CTC TTC TC	Expression
Otx2	M	mOtx2-F	AAA TCA ACT TGC CAG AAT CCA	Expression
		mOtx2-R	GGC CTC ACT TTG TTC TGA CC	Expression
Rpe65	M	mRpe65-F	TCA GGA GAT ATG TAC TTC CTT TGA CA	Expression
		mRpe65-R	TTG TAT GGG GCA GTG TGA CT	Expression
Lrat	M	mLrat-F	ATA CAG CCT ACT GTG GAA CA	Expression
		mLrat-R	CAG CCG AAG CAA GAC TGC TT	Expression
Rgr	M	mRgr-F	CCT GAA TGC CCT TGT TGC	Expression
		mRgr-R	CAG CCC TCT GAA CCA TGT G	Expression
Rdh5	M	mRdh5-F	GAA AGC TAC AGC TTC ACA CAT TG	Expression
		mRdh5-R	CAC ATG ATG GGA TGA GAT GC	Expression
Rlbp1	M	mRlbp1-F	TGC AAG TGT GAG AGA CAG CA	Expression
		mRlbp1-R	GCC TTT GTC CAG CAG TCA A	Expression
NF-kB targets
Icam1	M	mIcam1-F	CCC ACG CTA CCT CTG CTC	Expression
		mIcam1-R	GAT GGA TAC CTG AGC ATC ACC	Expression
Fn1	M	mFn1-F	ATG GAC GCA TCA CCT GTA CC	Expression
		mFn1-R	CTG AAG CAG GTT TCC TCG GT	Expression
Fth1	M	mFth1-F	CAT GAG GAG AGG GAG CAT GC	Expression
		mFth1-R	TCT CCC AGT CAT CAC GGT CT	Expression
Il1b	M	mIl1b-F	GTG GCA GCT ACC TGT GTC TT	Expression
		mIl1b-R	ATG AGT CAC AGA GGA TGG GC	Expression
Irf1	M	mIrf1-F	CCT GCC AGA CAT CGA GGA AG	Expression
		mIrf1-R	CGG CTG GAC TTG GAC TTT CT	Expression
Fas	M	mFas-F	ACA TGC TGT GGA TCT GGG C	Expression
		mFas-R	CCC GCC TCC TCA GCT TTA AA	Expression
Ifnb1	M	mIfnb1-F	CCT GGA GCA GCT GAA TGG AA	Expression
		mIfnb1-R	TCT TGG ATG GCA AAG GCA GT	Expression
Cox2	M	mCox2-F	ACC TGG TGA ACT ACG ACT GC	Expression
		mCox2-R	GGC TCA TGA GTG GAG AAC GT	Expression
EMT-related genes
Snai1	M	mSnai1-F	AAG ATG CAC ATC CGA AGC CA	Expression
		mSnai1-R	CAG TGG GAG CAG GAG AAT GG	Expression
Snai2	M	mSnai2-F	CGA ACC CAC ACA TTG CCT TG	Expression
		mSnai2-R	GTG AGG GCA AGA GAA AGG CT	Expression
Twist1	M	mTwist1-F	CAT GTC CGC GTC CCA CTA G	Expression
		mTwist1-R	TCC AGC TCC AGA GTC TCT AGA C	Expression
Zeb1	M	mZeb1-F	TCA TTT ATC CTG AGG CGC CC	Expression
		mZeb1-R	TCA CAA TAC GGG CAG GTG AG	Expression
Zeb2	M	mZeb2-F	GGA GAG TGT TGT GGA GCA CA	Expression
		mZeb2-R	ATT GTG GTC TGG ATC GTG GC	Expression
Vim	M	mVim-F	TGC GCC AGC AGT ATG AAA	Expression
		mVim-R	GCC TCA GAG AGG TCA GCA AA	Expression
Acta2 (α-SMA)	M	mActa2-F	GGC ATC ATC ACC AAC TGG GA	Expression
		mActa2-R	GTT CAG TGG TGC CTC TGT CA	Expression
Epithelial markers
Cdh1	M	mCdh1-F	TTG GTG TGG GTC AGG AAA TC	Expression
		mCdh1-R	GTG TCC CTC CAA ATC CGA TAC	Expression
Cdh2	M	mCdh2-F	CCA TCA TCG CTA TCC TTC TGT G	Expression
		mCdh2-R	TTG GCT TGG CGC TCT TTA T	Expression
Cdh3	M	mCdh3-F	ATC GTG GGA GGT GAT GAT GG	Expression
		mCdh3-R	GTG TTG GTC CTG AGC CTC AA	Expression
Tjp1 (ZO-1)	M	mTjp1-F	GCA GCT AAG GAA GAG TGG GA	Expression
		mTjp1-R	TAT CAG ACA CCG GCT CAG GA	Expression
Cdh1	M	mCdh1-standard-F	AGT GGA GAA CGA GGA ACC CT	Standard curve
		mCdh1-standard-R	GCG TGA AAA TGG CAC CAG TC	Standard curve
Cdh2	M	mCdh2-standard-F	TCC ATC CTG CGT GTG AAA GT	Standard curve
		mCdh2-standard-R	CTG GAG CTG GCT CAA GTC AT	Standard curve
Cdh3	M	mCdh3-standard-F	CAA CGA TAA CGC TCC GGA GT	Standard curve
		mCdh3-standard-R	TTC ACT GCA AAG GGA GCC TC	Standard curve
Anti-oxidant genes
Sod1	M	mSod1-F	CTC AGG AGA GCA TTC CAT CAT T	Expression
		mSod1-R	CTC CCA GCA TTT CCA GTC TT	Expression
Sod2	M	mSod2-F	CAG ATT GCT GCC TGC TCT AA	Expression
		mSod2-R	CTG AAG GTA GTA AGC GTG CTC	Expression
Cat	M	mCat-F	GAT GGT AAC TGG GAT CTT GTG G	Expression
		mCat-R	GTG GGT TTC TCT TCT GGC TAT G	Expression
Hmox1	M	mHmox1-F	ACA GAG GAA CAC AAA GAC CAG	Expression
		mHmox1-R	GTG TCT GGG ATG AGC TAG TG	Expression
Sirt6/SIRT6
Sirt6	M	mSirt6-F	AGG CCG TCT GGT CAT TGT C	Expression
		mSirt6-R	GCA CAT CAC CTC ATC CAC GTA	Expression
SIRT6	H	hSIRT6-F	TCT TCC AGT GTG GTG TTC CA	Expression
		hSIRT6-R	CCT CCA TGG TCC AGA CTC C	Expression
Control genes for qPCR
Gapdh	M	mGapdh-F	TCA ACA GCA ACT CCC ACT CTT CCA	Expression
		mGapdh-R	ACC CTG TTG CTG TAG CCG TAT TCA	Expression
Hprt1	M	mHprt1-F	TGC CGA GGA TTT GGA AAA AGT G	Expression
		mHprt1-R	AGA GGG CCA CAA TGT GAT GG	Expression
Actb	M	mActb-F	GGC TGT ATT CCC CTC CAT CG	Expression
		mActb-R	GGG GTA CTT CAG GGT CAG GA	Expression
Rplp0	M	mRplp0-F	ACT GGT CTA GGA CCC GAG AAG	Expression
		mRplp0-R	TCC CAC CTT GTC TCC AGT CT	Expression
Transgenic mice
SIRT6-ERT2	H	ESR1-HE14-3	GCT CTA CTT CAT CGC ATT CCT	Genotyping (ERT2)
		placF-4	GCG AGA TGC TCT TGA AGT CT	Genotyping (placF)
